# Supplementary figures and images for: PP4 inhibition sensitizes ovarian cancer to NK cell-mediated cytotoxicity via STAT1 activation and inflammatory signaling
Source: HighWire-hosted journal article supplement (doi:10.1136/jitc-2022-005026), 2022-12-01

Supplementary Figure 10

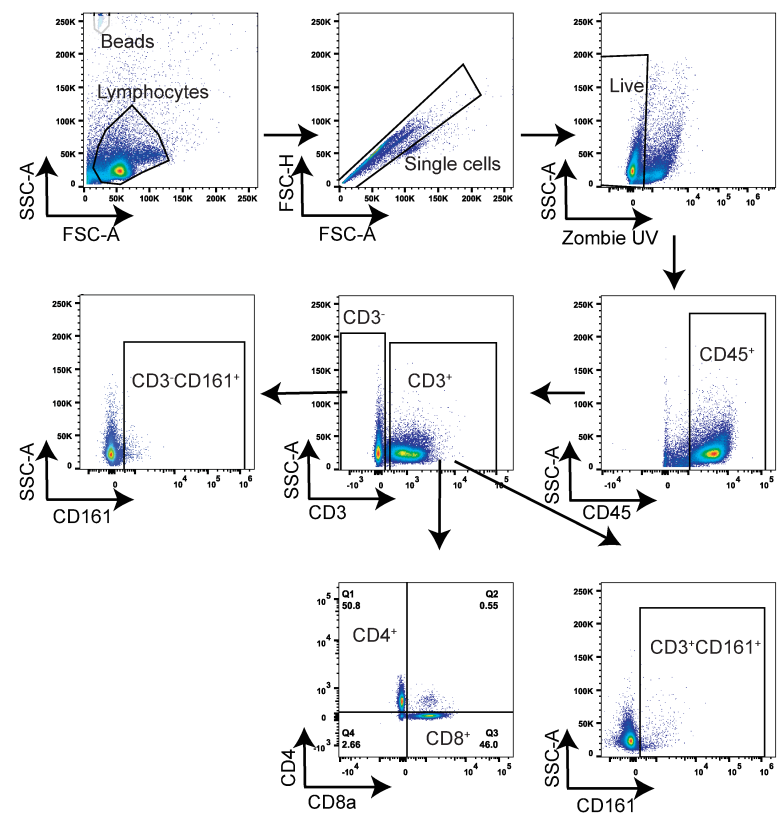

Supplement: jitc-2022-005026supp020_data_supplement.pdf [file jitc-2022-005026supp020_data_supplement.pdf]
